# Supplementary material for: Evolution of biofunctional semiconductor nanocrystals: a calorimetric investigation
Source: Royal Society of Chemistry journal article supplement (doi:10.1039/c3cp52158c), 2013-01-01
Supplement: c3cp52158c.pdf [file c3cp52158c.pdf]

## Supplementary information

### Evolution of Biofunctional Semiconductor Nanocrystals: A Calorimetric Investigation

*Debasmita Ghosh, Somrita Mondal, Chandra Nath Roy and Abhijit Saha\**

UGC-DAE Consortium for Scientific Research, Kolkata Centre, III/LB-8 Bidhannagar,

Kolkata 700 098, India

It is observed that the characteristics of UV-Vis and photoluminescence spectra of the end products of calorimetric titration, given in the manuscript are similar to that of our earlier works.<sup>1,2</sup> A typical absorption and luminescence spectra of Cys-CdS from our earlier work<sup>1</sup> is shown in figure S1.

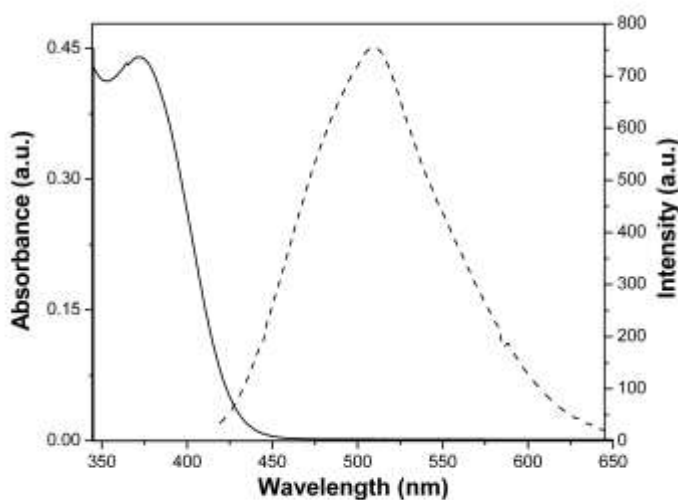

Figure S1. Typical absorbance and PL spectra of Cys-CdS

Figure S2 (a). shows the absorbance and luminescence spectra of end product of calorimetric titration for BSA-CdS at pH6 and Figure S2 (b) shows the UV-Vis and PL spectra of BSACdS from our previous work<sup>2</sup>.

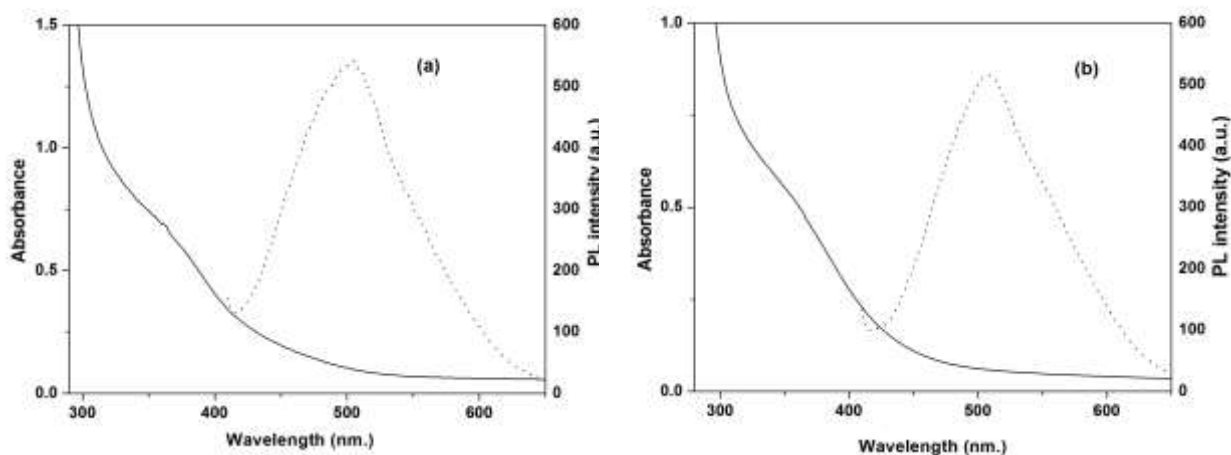

Fig. S2. UV and PL spectra of BSA capped CdS NPs: (a) end product of calorimetric titration and (b) synthesized following usual procedure from our earlier work<sup>2</sup>.

## Reference

- 1) A. Priyam, S. Ghosh, S.C. Bhattacharya and A. Saha, *J. Colloid Interf. Sci.* 2009, **333**, 195.
- 2) D. Ghosh, S. Ghosh, S. Mondal and A. Saha, *J. Mater. Chem.* 2012, **22**, 699.
